1 A novel *SERPINE1-FOSB* fusion gene in a case of pseudomyogenic

2 hemangioendothelioma results in activation of intact FOSB and the

3 PI3K-AKT-mTOR signaling pathway and responsiveness to sirolimus

4 Abbreviated title: A novel *SERPINE1-FOSB* fusion gene in PHE

5 Jun Ren <sup>1§</sup>, Xiaohui Wang <sup>1§</sup>, Yulin Zhou <sup>2</sup>, Xin Yue <sup>3</sup>, Shouhui Chen <sup>4</sup>, Xin Ding <sup>4</sup>,

6 Xiaoyong Jiang <sup>1</sup>, Xiaokun Liu <sup>1</sup>, and Qiwei Guo <sup>2\*</sup>

7 <sup>1</sup> Department of Dermatology, Zhongshan Hospital Xiamen University, Xiamen,

8 Fujian 361004, China.

9 <sup>2</sup> United Diagnostic and Research Center for Clinical Genetics, Women and

10 Children's Hospital, School of Medicine & School of Public Health, Xiamen

11 University. Xiamen, Fujian 361102, China.

12 <sup>3</sup> Department of Radiology, Zhongshan Hospital Xiamen University, Xiamen, Fujian

13 361004, China.

14 <sup>4</sup> Department of Pathology, Zhongshan Hospital Xiamen University, Xiamen, Fujian

15 361004, China.

16 <sup>§</sup> These authors contributed equally to this work.

17 \* **Correspondence to:** Qiwei Guo, United Diagnostic and Research Center for

18 Clinical Genetics, Women and Children's Hospital, School of Medicine & School of

19 Public Health, Xiamen University. Xiamen, Fujian 361102, China.

20 Email: [guoqiwei@xmu.edu.cn](mailto:guoqiwei@xmu.edu.cn). Phone: (86)592-7805028.

21

22

23 **Abstract**

24 Pseudomyogenic hemangioendothelioma (PHE) is an extremely rare disease that  
25 affects mainly the young and more men than women. PHE are multicentric, locally  
26 aggressive, have low metastatic potential, and affect multiple tissue planes. Genetic  
27 aberrations are frequently detected in PHE and may play important roles in the  
28 occurrence, development, and treatment of this disease. In this study, we report a case  
29 of PHE with a novel *SERPINE1-FOSB* fusion gene. The fusion introduced a strong  
30 promoter near the coding region of *FOSB*, resulting in overexpression of intact FOSB.  
31 Immunohistochemical analysis showed overexpression of pAKT and mTOR in tumor  
32 cells, suggesting activation of the PI3K-AKT-mTOR signaling pathway. The patient  
33 responded well to targeted therapy with sirolimus, an mTOR inhibitor. Our study  
34 correlated dysregulation of a specific signaling pathway and the effectiveness of a  
35 targeted therapy to a specific genetic aberration. This information may be useful for  
36 future investigations of targeted therapeutics and provide a potential predictive  
37 biomarker for therapeutic effectiveness in cases of PHE with this genetic aberration.

38

39 **Keywords**

40 FOSB, PI3K-AKT-mTOR signaling pathway, pseudomyogenic  
41 hemangioendothelioma, *SERPINE1-FOSB* fusion, sirolimus

42

## 43 **Introduction**

44 Pseudomyogenic hemangioendothelioma (PHE) is an extremely rare disease that was  
45 included in the 2013 WHO classification of soft tissue and bone tumors.<sup>1</sup> This disease  
46 occurs mainly in the young population and affects more men than women. PHE are  
47 typically multicentric, locally aggressive, have low metastatic potential, and affect  
48 multiple tissue planes.<sup>1,2</sup>

49 Histologically, PHE is characterized by loose fascicles of spindled and epithelioid  
50 cells, abundant eosinophilic cytoplasm, and vesicular nuclei with distinct nucleoli. In  
51 some cases, neutrophilic inflammatory infiltrates have been noted.<sup>1,2</sup>

52 Immunohistochemically, tumor cells are positive for factor VIII, FLI-1, INI-1,  
53 vimentin, MDM2, CDK4, CD31, cytokeratin AE1/AE3, EMA, and P63 and negative  
54 for CD34, S-100, SMA, desmin, MyoD1, and HMB45.<sup>2,3</sup> Genetically, chromosomal  
55 rearrangements that result in the fusion of all or part of the *FOSB* coding region with  
56 the promoters of other genes, such as *SERPINE1*, *ACTB*, *WWTR1*, and *CLTC*, have  
57 been frequently identified in PHE, suggesting that activation of *FOSB* plays an  
58 important role in the pathogenesis.<sup>2,4-11</sup>

59 In terms of PHE treatment, the multifocal nature and high risk of relapse limit the  
60 efficacy of surgical excision.<sup>3,12</sup> Conventional chemotherapy has been administered in  
61 some cases, with variable efficacy. However, intolerable toxic effects have been  
62 noted.<sup>12</sup> In contrast, several targeted drugs, such as sirolimus, everolimus, and  
63 telatinib, have shown efficacy with fewer side effects than chemotherapy.<sup>12-16</sup>

64 Unfortunately, the low incidence of PHE does not allow investigators to perform

65 systematic clinical trials to evaluate the efficacy of a specific treatment, and long-term  
66 follow-up data for a specific treatment are limited. Therefore, no systemic therapies  
67 have been officially approved for the management of PHE. Thus, in depth knowledge  
68 regarding the pathogenesis and treatment and follow-up data for each case of PHE are  
69 valuable for understanding and managing this rare disease.

70 Here, we report the diagnosis, genetic examination, treatment, and follow-up of a  
71 patient with PHE and discuss the correlation of genetic aberrations with signaling  
72 pathway dysregulation and therapeutic effectiveness.

### 73 **Materials and methods**

#### 74 **Histological and immunohistochemical analysis**

75 Resected tumor samples were fixed in 10% buffered formalin and embedded in  
76 paraffin to prepare 4-mm sections. For histological analysis, the sections were stained  
77 with hematoxylin and eosin. Immunohistochemical analysis of cytokeratin AE1/AE3,  
78 CD31, ERG, INI-1, BCL-2, Ki67, CD34, D2-40, S-100, SMA, and STAT6 was  
79 performed using the BenchMark XT automated slide preparation system (Roche).  
80 Immunohistochemical analysis of FOSB, pAKT, and mTOR was performed as  
81 follows. The paraffin was removed from the sectioned tumor samples with xylene,  
82 and the sections were rehydrated in a graded series of ethanol, followed by  
83 heat-induced epitope retrieval in a pressure cooker and blocking of endogenous  
84 peroxidase activity. Next, the sections were incubated with primary antibodies  
85 overnight at 4 °C and then with a rabbit secondary antibody and finally reacted with 3,  
86 3'-diaminobenzidine. The samples were counterstained with hematoxylin. Finally, the

87 slides were analyzed using an E200MV microscope (Nikon).

### 88 **Detection of the *SERPINE1-FOSB* fusion gene**

89 RNA was extracted from a freshly resected tumor sample using the RNeasy Mini Kit  
90 (Qiagen) and reverse transcribed using the RevertAid First Strand cDNA Synthesis  
91 Kit (Thermo Fisher) according to the manufacturer's protocol. The cDNA was  
92 amplified in a 20- $\mu$ L reaction containing 1 $\times$  FastPfu Buffer (TransGen Biotech,  
93 Beijing, China), 1 U of TransStart<sup>®</sup> FastPfu DNA polymerase (TransGen Biotech),  
94 2.5 mmol/L Mg<sup>2+</sup>, 0.2 mmol/L of each deoxy-nucleoside triphosphate, and 0.2  $\mu$ mol/L  
95 each forward and reverse primer. Based on a previous study,<sup>4</sup> an upstream primer  
96 targeting *SERPINE1* (5'-AGAGCGCTGTCAAGAAGACC-3') and a downstream  
97 primer targeting *FOSB* (5'-GTTCCCGGCATGTCGTAG-3') were used. PCR was  
98 performed on a ProFlex PCR System (Thermo Fisher) under the following cycling  
99 conditions: 95 °C for 3 min, followed by 30 cycles at 95 °C for 30 s, 58 °C for 30 s,  
100 and 72 °C for 3 min, with a final extension for 5 min at 72 °C.

101 The PCR products were examined by electrophoresis on a 1% agarose gel containing  
102 1 $\times$  GoldView<sup>™</sup> Dye (SBSGENE, Shanghai, China) for staining. The recovered PCR  
103 products were examined using commercial Sanger sequencing (Sangon, Shanghai,  
104 China).

### 105 **Ethics statement**

106 Signed informed consent was obtained from the patient for the use of his materials  
107 and publication of de-identified clinical data, including photographs. The study was  
108 approved by the Research Ethics Committee of Zhongshan Hospital Xiamen

109 University.

## 110 **Results**

### 111 **Clinical diagnosis of the case**

112 A 61-year-old man with no specific history of disease presented with rapidly  
113 progressive multifocal nodules and localized pain in the left hip and left iliac region  
114 for more than 2 months. The skin lesions were discontinuous, raised, or subcutaneous,  
115 0.3–1.5 cm in diameter, with a smooth surface (Fig. 1A). The physical examination  
116 was otherwise normal, and superficial lymph nodes were not enlarged. Magnetic  
117 resonance imaging (MRI) revealed multiple lesions in the ilium (Fig. 1C), gluteus  
118 medius, gluteus minimus, and subcutaneous region of the left hip (Fig. 1H).

119 As shown in Fig. 2, histopathological examination of a biopsy sample from the left  
120 hip revealed that the nodule was in the dermis and subcutaneous tissue and was  
121 composed of loose fascicles of spindled and epithelioid cells, with abundant  
122 eosinophilic cytoplasm and vesicular nuclei with distinct nucleoli. Neutrophil  
123 infiltration and intravascular tumor thrombus were also observed.

124 Immunohistochemical analysis revealed that the biopsy was positive for cytokeratin  
125 AE1/AE3, CD31, ERG, INI-1, BCL-2, and Ki67 (15%) (Fig. 3) and negative for  
126 CD34, D2-40, S100, SMA, and STAT6 (data not shown).

127 Based on the clinical presentation, histomorphology, and expression of keratins and  
128 endothelial markers in the immunohistochemical analysis, the nodules were diagnosed  
129 as PHE.

### 130 **The tumor was responsive to sirolimus**

131 After diagnosis, the patient underwent surgical resection to remove the palpable  
132 nodules and was administered two cycles of anlotinib hydrochloride (10 mg/d) every  
133 2 weeks. During the first cycle of chemotherapy, fresh nodules developed, and pain  
134 remained. During the second cycle of chemotherapy, no evidence of tumor  
135 development was observed, and the pain was alleviated. However, no evident  
136 improvement was noted on follow-up MRI, and chemotherapy was halted due to  
137 drug-induced nosebleeds and periungual sclerosis (Fig. 1D and I). The patient was  
138 then treated with radiotherapy 5 days a week (Monday–Friday) via 6 MV linear  
139 accelerator at a dose of 5000 cGy. Unfortunately, no improvement was noted after 5  
140 weeks of radiotherapy (Fig. 1E and J).

141 Eventually, targeted therapy with sirolimus, an orally available mTOR inhibitor, was  
142 started (1 mg/day), and oxycodone (50 mg bid) was administered for pain control. At  
143 2-month follow-up, no fresh nodules had developed, and the pain was alleviated (Fig.  
144 1B). Moreover, no drug-induced toxic effects were noted on physical examination.

145 Therefore, the dose of sirolimus was increased to 2 mg/day. Follow-up MRI was  
146 performed at 5 and 20 months after sirolimus treatment, which showed general  
147 improvement of the disease (Fig. 1F, G, K and L), and the largest lesion in the left  
148 gluteus medius had progressively shrunk. Since the pain was alleviated, a reduced  
149 dose of oxycodone (10 mg each night) was sufficient for pain control. Based on the  
150 clinical improvement and lack of side effects, sirolimus therapy and follow-up are  
151 ongoing.

152 **The *SERPINE1-FOSB* fusion gene activates *FOSB* and the EGFR-pAKT-mTOR**

153 **pathway**

154 Since the nodules were diagnosed as PHE and they were responsive to sirolimus, we  
155 investigated the possible pathogenetic and therapeutic mechanisms. We first examined  
156 the nodules for the presence of a *SERPINE1-FOSB* fusion gene. As shown in Fig. 4A,  
157 when the tumor DNA sample was amplified with primers designed for the presence of  
158 a *SERPINE1-FOSB* fusion gene, an amplicon was generated. Sanger sequencing of  
159 the amplicon revealed a novel *SERPINE1-FOSB* fusion gene, in which the  
160 breakpoints of both genes were in non-coding exon 1. Moreover, a 52-bp fragment  
161 from intron 1 of *SERPINE1* was inserted at the fusion junction (Fig. 4B). Since the  
162 coding region of *FOSB* was unaffected, the fusion gene could generate an intact  
163 FOSB protein. Next, we examined the expression levels of FOSB, pAKT, and mTOR  
164 in the tumor. As shown in Fig. 3, strong expression was noted for these targets,  
165 suggesting that the fusion gene activates FOSB and the PI3K-AKT-mTOR signaling  
166 pathway.

167 **Discussion**

168 Genetic aberrations play important roles in the occurrence, development, and  
169 treatment of various human tumors. In PHE, chromosomal rearrangements leading to  
170 the fusion of *FOSB* (the whole or partial coding region) with other genes, such as  
171 *SERPINE1*, *ACTB*, *WWTRI*, and *CLTC*, have been identified.<sup>2, 4-11</sup> The common  
172 feature of these cases is that the fusion introduces a strong promoter, resulting in  
173 deregulated overexpression of intact, partial, or chimeric FOSB. However, the  
174 pathogenetic mechanism by which these genetic aberrations lead to PHE, which is of



175 value for the development of effective targeted treatments, remains largely unknown.

176 Recently, van IJzendoorn et al.<sup>16</sup> demonstrated that a *SERPINE1-FOSB*

177 fusion-derived chimeric protein could function as an active transcription factor that

178 was not only capable of regulating its own transcription but also upregulating the

179 expression of PDGFRA and FLT1. In their case, the tumors were responsive to

180 telatinib, a drug currently in clinical trials, that can block self-regulation of the fusion

181 gene by specifically affecting PDGFRA, FLT1, and FLT4 signaling and

182 downregulating SERPINE1. However, the presence of different genetic aberrations,

183 such as fusions with different genes or different domains, could alter the pathogenesis

184 as well as the treatment. Therefore, further investigation is required to demonstrate

185 whether this drug is effective in cases with other genetic aberrations such as

186 *SERPINE1-FOSB* fusions with intact or truncated *FOSB* or *ACTB-FOSB* fusions.

187 Similar to a previous case,<sup>15</sup> in our case, mTOR was overexpressed as was pAKT (Fig.

188 3), suggesting activation of the PI3K-AKT-mTOR signaling pathway, one of the most

189 frequently dysregulated pathways in human cancers that regulates important cellular

190 functions, including metabolism, motility, growth, and proliferation.<sup>17</sup> Dysregulation

191 of this pathway supports the survival, expansion, and dissemination of cancer cells.<sup>17</sup>

192 Genetic alterations in specific oncogenes or tumor suppressor genes, such as *PIK3CA*,

193 *PIK3RI*, *AKT*, *MTOR*, *TSC1*, and *TSC2*, can aberrantly activate this pathway via

194 diverse mechanisms. However, these genetic alterations also provide opportunities for

195 therapeutic targeting of this pathway and potential predictive biomarkers of

196 therapeutic effectiveness.<sup>17</sup> Currently, several distinct classes of drugs targeting the

197 PI3K-AKT-mTOR signaling pathway, including PI3K and AKT inhibitors, as well as  
198 mTOR inhibitors, have been developed and have shown clinical potential.<sup>18</sup> mTOR  
199 inhibitors, such as sirolimus and everolimus, have been effectively used for targeted  
200 therapy of PHE.<sup>12-15</sup> However, the genetic information for mTOR inhibitor-responsive  
201 cases is limited. In some cases, the genetic information was missing,<sup>14</sup> while in others,  
202 although a translocation or gene fusion was reported, the translational products of the  
203 fusion gene were not described.<sup>13, 15</sup> Most recently, Bridge et al.<sup>7</sup> reported a  
204 *CLTC-FOSB* fusion gene resulting in a chimeric protein in a case of PHE, and the  
205 tumor was responsive to sirolimus therapy. In our study, we clearly correlated the  
206 effectiveness of sirolimus therapy with a PHE-related genetic aberration, that is, a  
207 *SERPINE1-FOSB* fusion resulting in overexpression of intact FOSB. This genetic  
208 aberration could be a predictive biomarker for effective sirolimus therapy. FOSB  
209 belongs to the Fos family, which is associated with various cellular functions,  
210 including proliferation, differentiation, and transformation, and it is frequently  
211 involved in the pathogenesis of vascular tumors.<sup>19-22</sup> However, the causal relationship  
212 between FOSB overexpression and activation of the PI3K-AKT-mTOR signaling  
213 pathway remains unclear. Nonetheless, the use of combinations of inhibitors targeting  
214 the PI3K-AKT-mTOR signaling pathway in PHE cases is worthwhile, since this  
215 strategy has been shown to be more effective than monotherapy, owing to the  
216 inhibition of compensatory mechanisms involved in intrinsic and adaptive  
217 resistance.<sup>23, 24</sup> Future investigations of the interconnecting cascades between the  
218 PHE-related genetic aberrations and this signaling pathway will advance our

219 knowledge of PHE and aid in the development of personalized agents with greater  
220 target specificity and optimal therapeutic index.

221 In conclusion, we report a novel *SERPINE1-FOSB* fusion gene in a patient with PHE  
222 that was responsive to sirolimus therapy. The fusion gene resulted in overexpression  
223 of intact FOSB, pAKT, and mTOR, suggesting activation of the PI3K-AKT-mTOR  
224 signaling pathway. Our study correlated the dysregulation of a specific signaling  
225 pathway and the effectiveness of a specific targeted therapy to a specific genetic  
226 aberration, which could promote the investigation of therapeutic targets and provide a  
227 predictive biomarker of therapeutic effectiveness for PHE with this type of genetic  
228 aberration.

## 229 **Acknowledgments**

230 We thank Dr. Qinhe Fan and Fanfan Shu for their kind supports to this work. This  
231 work was supported by the Key Clinical Specialty Discipline Construction Program  
232 of Fujian Province (Grant No. 050145).

## 233 **References**

- 234 1. Hornick JL, Fletcher CD. Pseudomyogenic hemangioendothelioma: a distinctive, often  
235 multicentric tumor with indolent behavior. *Am J Surg Pathol* 2011; **35**: 190-201.
- 236 2. Inyang A, Mertens F, Puls F, Sumathi V, Inwards C, et al. Primary Pseudomyogenic  
237 Hemangioendothelioma of Bone. *Am J Surg Pathol* 2016; **40**: 587-98.
- 238 3. Pranteda G, Magri F, Muscianese M, Pigliacelli F, D'Arino A, et al. The management of  
239 pseudomyogenic hemangioendothelioma of the foot: A case report and review of the literature.  
240 *Dermatol Ther* 2018; **31**: e12725.

- 241 4. Walther C, Tayebwa J, Lilljebjorn H, Magnusson L, Nilsson J, et al. A novel  
242 SERPINE1-FOSB fusion gene results in transcriptional up-regulation of FOSB in  
243 pseudomyogenic haemangioendothelioma. *J Pathol* 2014; **232**: 534-40.
- 244 5. Agaram NP, Zhang L, Cotzia P, Antonescu CR. Expanding the Spectrum of Genetic  
245 Alterations in Pseudomyogenic Hemangioendothelioma With Recurrent Novel ACTB-FOSB  
246 Gene Fusions. *Am J Surg Pathol* 2018; **42**: 1653-61.
- 247 6. Panagopoulos I, Lobmaier I, Gorunova L, Heim S. Fusion of the Genes WWTR1 and  
248 FOSB in Pseudomyogenic Hemangioendothelioma. *Cancer Genomics Proteomics* 2019; **16**:  
249 293-8.
- 250 7. Bridge JA, Sumegi J, Royce T, Baker M, Linos K. A novel CLTC-FOSB gene fusion in  
251 pseudomyogenic hemangioendothelioma of bone. *Genes Chromosomes Cancer* 2021; **60**:  
252 38-42.
- 253 8. Alegria-Landa V, Santonja C, Jo-Velasco M, Kutzner H, Requena L. Cutaneous  
254 pseudomyogenic (epithelioid sarcoma-like) haemangioendothelioma FOSB  
255 immunohistochemistry demonstrating the SERPINE1-FOSB fusion gene. *J Eur Acad Dermatol*  
256 *Venerol* 2017; **31**: e550-e2.
- 257 9. Ide YH, Tsukamoto Y, Ito T, Watanabe T, Nakagawa N, et al. Penile pseudomyogenic  
258 hemangioendothelioma/epithelioid sarcoma-like hemangioendothelioma with a novel pattern  
259 of SERPINE1-FOSB fusion detected by RT-PCR--report of a case. *Pathol Res Pract* 2015;  
260 **211**: 415-20.
- 261 10. Pradhan D, Schoedel K, McGough RL, Ranganathan S, Rao UNM. Pseudomyogenic  
262 hemangioendothelioma of skin, bone and soft tissue-a clinicopathological,

- 263 immunohistochemical, and fluorescence in situ hybridization study. *Hum Pathol* 2018; **71**:  
264 126-34.
- 265 11. Trombetta D, Magnusson L, von Steyern FV, Hornick JL, Fletcher CD, et al. Translocation  
266 t(7;19)(q22;q13)-a recurrent chromosome aberration in pseudomyogenic  
267 hemangioendothelioma? *Cancer Genet* 2011; **204**: 211-5.
- 268 12. Joseph J, Wang WL, Patnana M, Ramesh N, Benjamin R, et al. Cytotoxic and targeted  
269 therapy for treatment of pseudomyogenic hemangioendothelioma. *Clin Sarcoma Res* 2015; **5**:  
270 22.
- 271 13. Danforth OM, Tamulonis K, Vavra K, Oh C, Brickman A, et al. Effective Use of Sirolimus  
272 and Zoledronic Acid for Multiosteotic Pseudomyogenic Hemangioendothelioma of the Bone in  
273 a Child: Case Report and Review of Literature. *J Pediatr Hematol Oncol* 2019; **41**: 382-7.
- 274 14. Gabor KM, Sapi Z, Tizslavicz LG, Fige A, Bereczki C, et al. Sirolimus therapy in the  
275 treatment of pseudomyogenic hemangioendothelioma. *Pediatr Blood Cancer* 2018; **65**.
- 276 15. Ozeki M, Nozawa A, Kanda K, Hori T, Nagano A, et al. Everolimus for Treatment of  
277 Pseudomyogenic Hemangioendothelioma. *J Pediatr Hematol Oncol* 2017; **39**: e328-e31.
- 278 16. van IDGP, Sleijfer S, Gelderblom H, Eskens F, van Leenders G, et al. Telatinib Is an  
279 Effective Targeted Therapy for Pseudomyogenic Hemangioendothelioma. *Clin Cancer Res*  
280 2018; **24**: 2678-87.
- 281 17. Janku F, Yap TA, Meric-Bernstam F. Targeting the PI3K pathway in cancer: are we  
282 making headway? *Nat Rev Clin Oncol* 2018; **15**: 273-91.
- 283 18. Polivka J, Jr., Janku F. Molecular targets for cancer therapy in the PI3K/AKT/mTOR  
284 pathway. *Pharmacol Ther* 2014; **142**: 164-75.

- 285 19. Kataoka F, Tsuda H, Arao T, Nishimura S, Tanaka H, et al. EGRI and FOSB gene  
286 expressions in cancer stroma are independent prognostic indicators for epithelial ovarian  
287 cancer receiving standard therapy. *Genes Chromosomes Cancer* 2012; **51**: 300-12.
- 288 20. Antonescu CR, Chen HW, Zhang L, Sung YS, Panicek D, et al. ZFP36-FOSB fusion  
289 defines a subset of epithelioid hemangioma with atypical features. *Genes Chromosomes*  
290 *Cancer* 2014; **53**: 951-9.
- 291 21. Durchdewald M, Angel P, Hess J. The transcription factor Fos: a Janus-type regulator in  
292 health and disease. *Histol Histopathol* 2009; **24**: 1451-61.
- 293 22. Catar R, Witowski J, Wagner P, Annett Schramm I, Kawka E, et al. The proto-oncogene  
294 c-Fos transcriptionally regulates VEGF production during peritoneal inflammation. *Kidney Int*  
295 2013; **84**: 1119-28.
- 296 23. Janku F, Hong DS, Fu S, Piha-Paul SA, Naing A, et al. Assessing PIK3CA and PTEN in  
297 early-phase trials with PI3K/AKT/mTOR inhibitors. *Cell Rep* 2014; **6**: 377-87.
- 298 24. Janku F, Wheeler JJ, Naing A, Falchook GS, Hong DS, et al. PIK3CA mutation H1047R is  
299 associated with response to PI3K/AKT/mTOR signaling pathway inhibitors in early-phase  
300 clinical trials. *Cancer Res* 2013; **73**: 276-84.

301

302

303

304 **Figure 1. Skin lesions and magnetic resonance imaging of the case.** (A) Multiple  
305 nodules were present at diagnosis. (B) Remission of the lesions was evident after  
306 sirolimus therapy for 2 months. Lesions with high signal intensity in the ilium at  
307 diagnosis (C), after chemotherapy (D), after radiotherapy (E), and after sirolimus  
308 therapy for 5 (F) and 20 months (G), respectively. Lesions with high signal intensity  
309 in the gluteus medius, gluteus minimus, and subcutaneous region of the left hip at  
310 diagnosis (H), after chemotherapy (I), after radiotherapy (J), and after sirolimus  
311 therapy for 5 (K) and 20 months (L), respectively. The size of the largest lesion was  
312 indicated.  
313  
314

315 **Figure 2. Histopathological examination of a biopsy sample from the left hip.**

316



317 **Figure 3. Positive immunohistochemical staining of a biopsy sample from the left**

318 **hip (400×).**

319

320 **Figure 4. Identification of a *SERPINE1-FOSB* fusion gene.** (A) Amplification of  
321 the fusion gene with a specific primer pair. (B) Sanger sequencing of the amplicon  
322 showing the structure of the fusion gene. NTC: no template control.

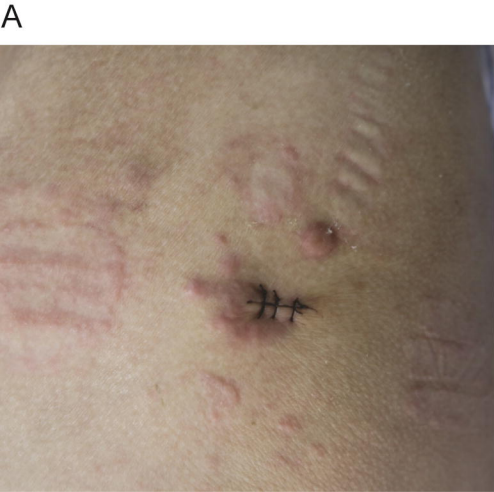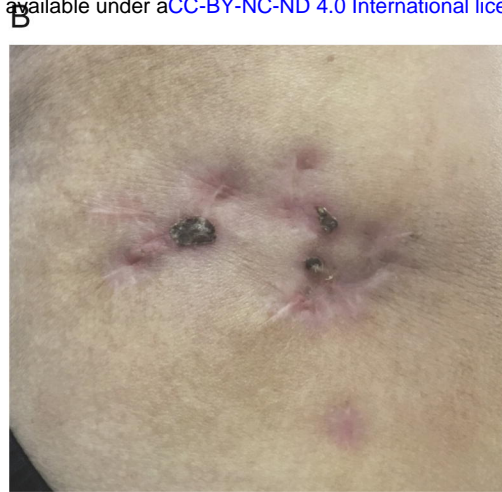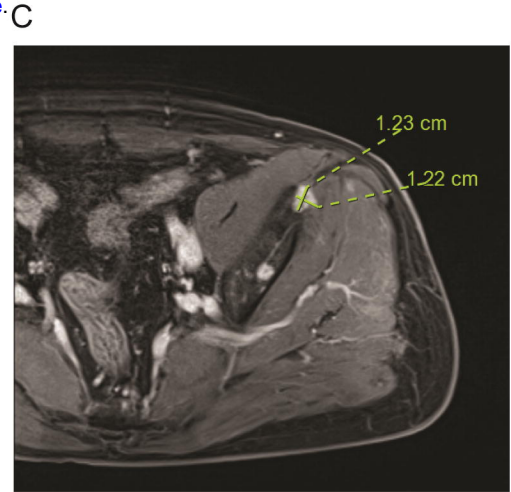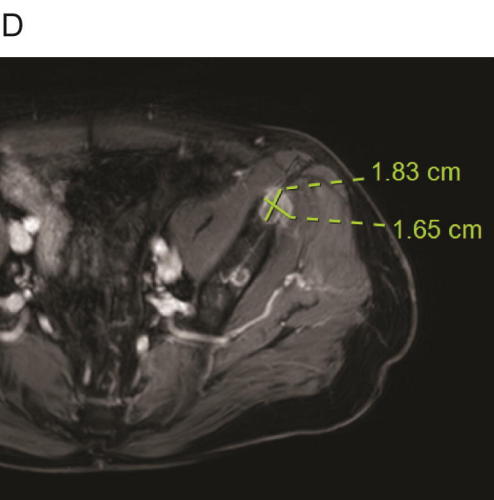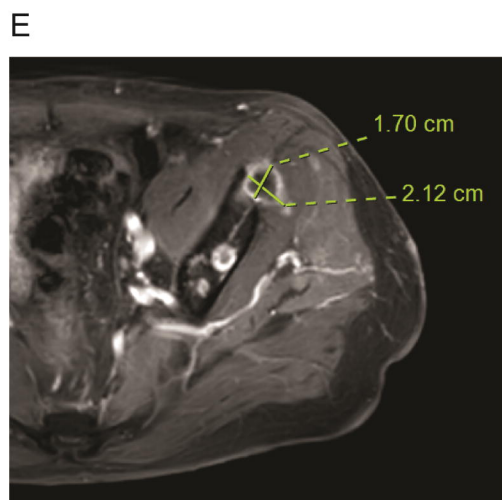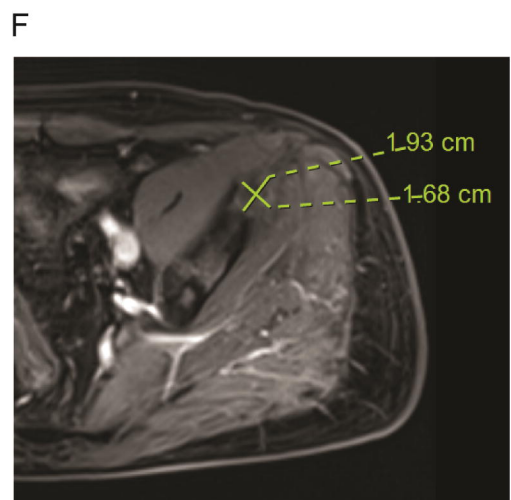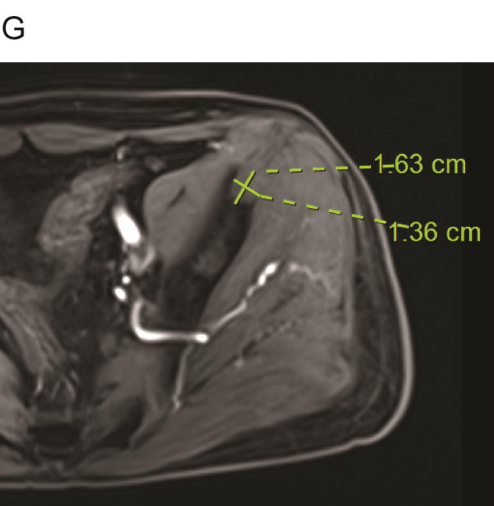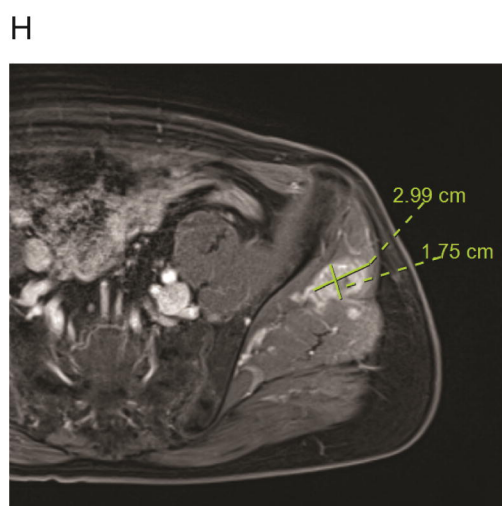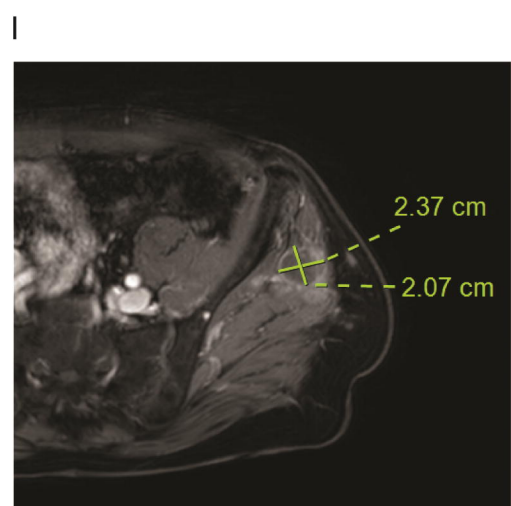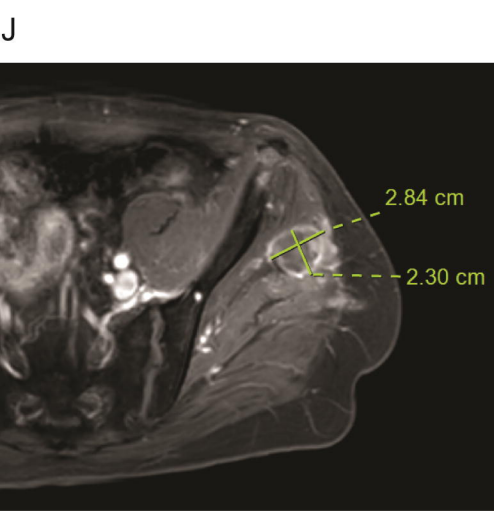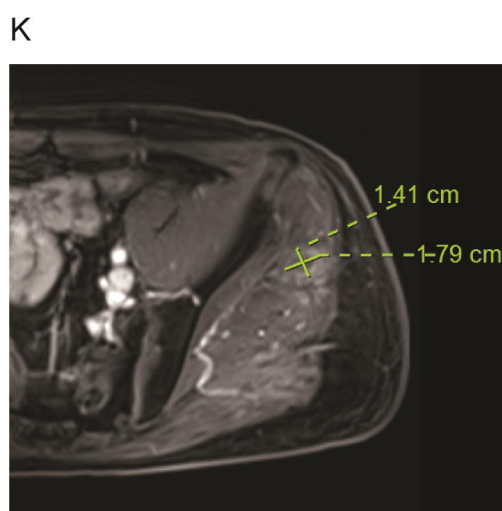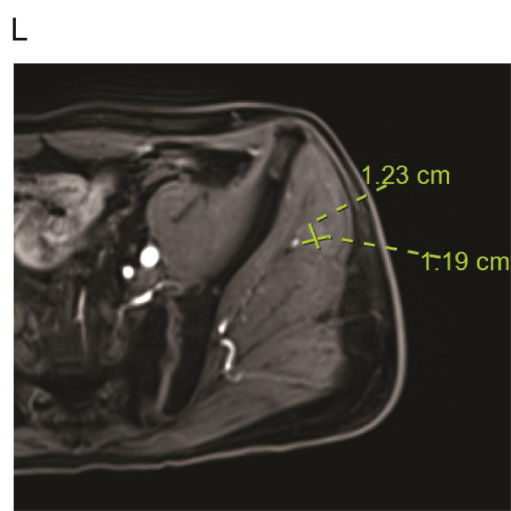

100 ×

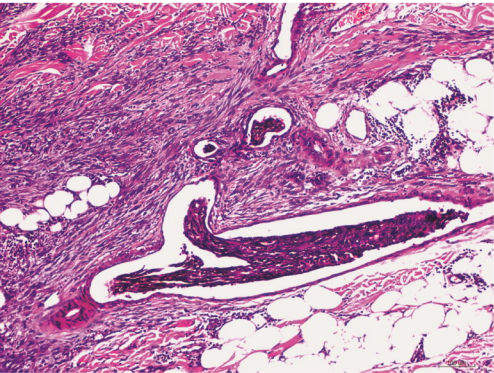

200 ×

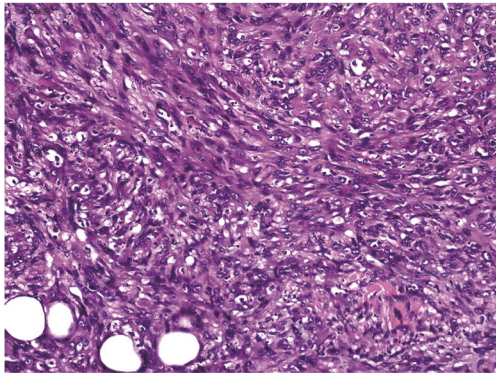

400 ×

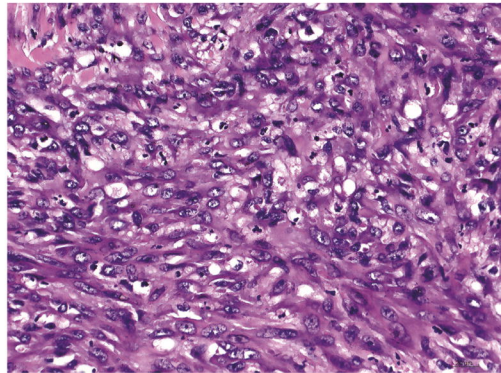

AE1/AE3

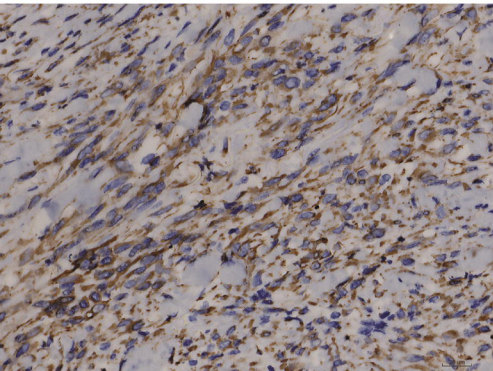

CD31

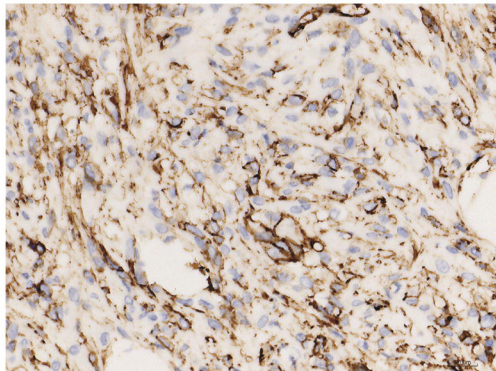

ERG

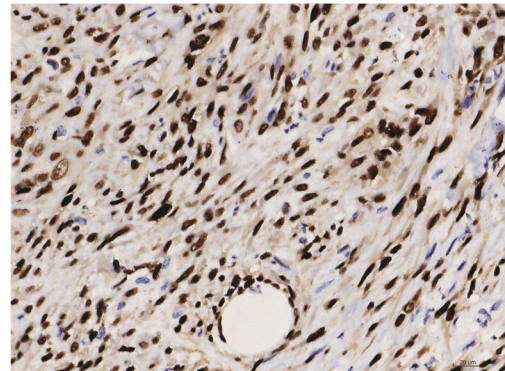

INI-1

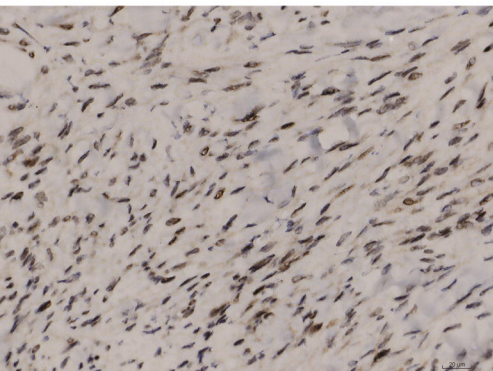

BCL-2

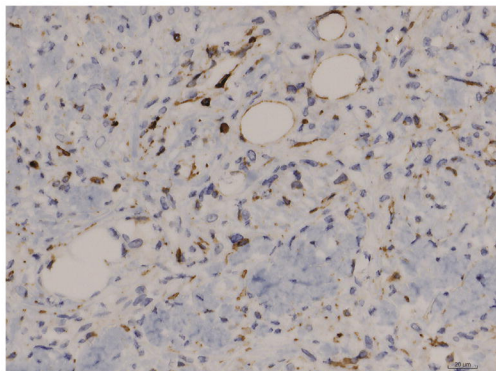

Ki67

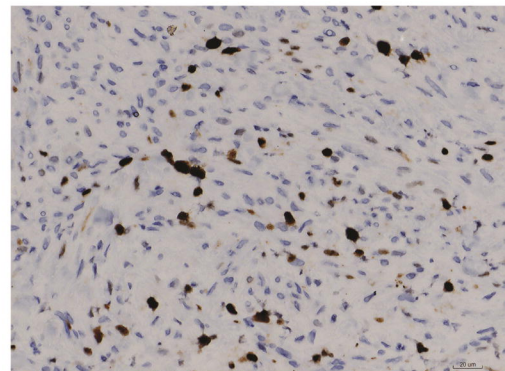

FOSB

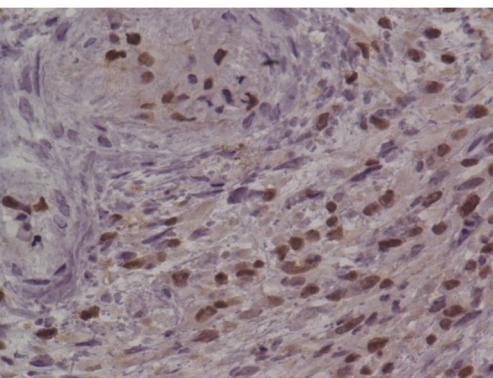

pAKT

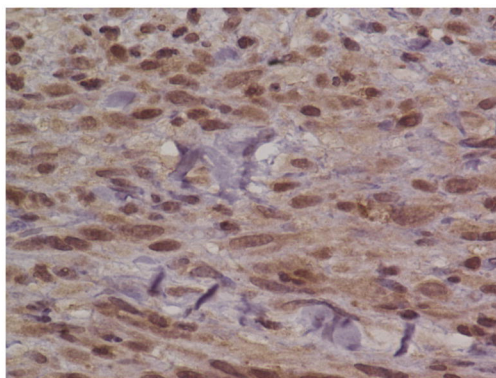

mTOR

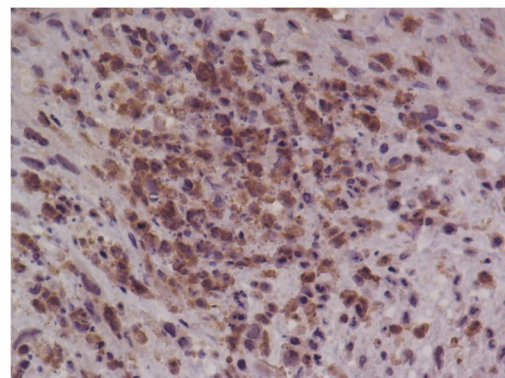

**A**

Sample NTC Ladder bp

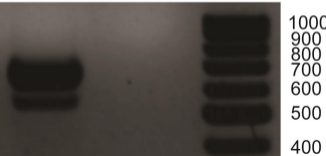**B**

*SERPINE1* exon 1  
(-157, NG\_013213.1)

*SERPINE1* intron 1  
(1010-1061, NG\_013213.1)

*FOSB* exon 1  
(5406 - , NG\_029675.1)

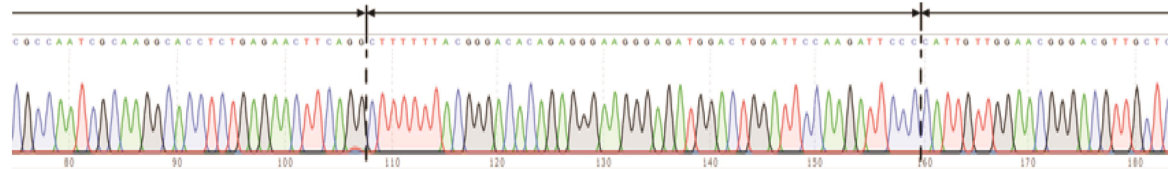

Source: https://www.biorxiv.org/content/10.1101/2021.05.22.445285v1.full.pdf
